# Supplementary material for: The Ser/Thr kinase MAP4K4 drives c-Met-induced motility and invasiveness in a cell-based model of SHH medulloblastoma
Source: PubMed Central journal article supplement (PMC4302160; doi:10.1186/s40064-015-0784-2), 2015-01-14
Supplement: 40064_2015_784_MOESM9_ESM.pdf [file 40064_2015_784_MOESM9_ESM.pdf]

| Fig. 1A, c-Met high                        |                            |        |                        |         |                   |  |
|--------------------------------------------|----------------------------|--------|------------------------|---------|-------------------|--|
| Table Analyzed                             | c-Met high than av. cereb. |        |                        |         |                   |  |
| One-way analysis of variance               |                            |        |                        |         |                   |  |
| P value                                    | 0.0007                     |        |                        |         |                   |  |
| P value summary                            | ***                        |        |                        |         |                   |  |
| Are means signif. different? (P < 0.05)    | Yes                        |        |                        |         |                   |  |
| Number of groups                           | 4                          |        |                        |         |                   |  |
| F                                          | 6.977                      |        |                        |         |                   |  |
| R square                                   | 0.3552                     |        |                        |         |                   |  |
| Bartlett's test for equal variances        |                            |        |                        |         |                   |  |
| Bartlett's statistic (corrected)           | 6.464                      |        |                        |         |                   |  |
| P value                                    | 0.0911                     |        |                        |         |                   |  |
| P value summary                            | ns                         |        |                        |         |                   |  |
| Do the variances differ signif. (P < 0.05) | No                         |        |                        |         |                   |  |
| ANOVA Table                                | SS                         | df     | MS                     |         |                   |  |
| Treatment (between columns)                | 18.93                      | 3      | 6.31                   |         |                   |  |
| Residual (within columns)                  | 34.37                      | 38     | 0.9044                 |         |                   |  |
| Total                                      | 53.29                      | 41     |                        |         |                   |  |
| Bonferroni's Multiple Comparison Test      | Mean Diff.                 | t      | Significant? P < 0.05? | Summary | 95% CI of diff    |  |
| Nor. cereb. - Roth - 9 - vs MB Gilbertson  | -1.664                     | 3.968  | Yes                    | **      | -2.831 to -0.4967 |  |
| Nor. cereb. - Roth - 9 - vs MB Kool        | -1.726                     | 4.117  | Yes                    | **      | -2.894 to -0.5592 |  |
| Nor. cereb. - Roth - 9 - vs MB Delattre    | -1.35                      | 3.011  | Yes                    | *       | -2.598 to -0.1022 |  |
| MB Gilbertson vs MB Kool                   | -0.0625                    | 0.161  | No                     | ns      | -1.143 to 1.018   |  |
| MB Gilbertson vs MB Delattre               | 0.3139                     | 0.7485 | No                     | ns      | -0.8533 to 1.481  |  |
| MB Kool vs MB Delattre                     | 0.3764                     | 0.8976 | No                     | ns      | -0.7908 to 1.544  |  |

| Fig. 1A, CD44                              |            |        |                        |         |                   |  |
|--------------------------------------------|------------|--------|------------------------|---------|-------------------|--|
| Table Analyzed                             | CD44       |        |                        |         |                   |  |
| One-way analysis of variance               |            |        |                        |         |                   |  |
| P value                                    | 0.0066     |        |                        |         |                   |  |
| P value summary                            | **         |        |                        |         |                   |  |
| Are means signif. different? (P < 0.05)    | Yes        |        |                        |         |                   |  |
| Number of groups                           | 4          |        |                        |         |                   |  |
| F                                          | 4.194      |        |                        |         |                   |  |
| R square                                   | 0.05919    |        |                        |         |                   |  |
| Bartlett's test for equal variances        |            |        |                        |         |                   |  |
| Bartlett's statistic (corrected)           | 7.896      |        |                        |         |                   |  |
| P value                                    | 0.0482     |        |                        |         |                   |  |
| P value summary                            | *          |        |                        |         |                   |  |
| Do the variances differ signif. (P < 0.05) | Yes        |        |                        |         |                   |  |
| ANOVA Table                                | SS         | df     | MS                     |         |                   |  |
| Treatment (between columns)                | 22.29      | 3      | 7.431                  |         |                   |  |
| Residual (within columns)                  | 354.3      | 200    | 1.772                  |         |                   |  |
| Total                                      | 376.6      | 203    |                        |         |                   |  |
| Bonferroni's Multiple Comparison Test      | Mean Diff. | t      | Significant? P < 0.05? | Summary | 95% CI of diff    |  |
| Nor. cereb. - Roth - 9 - vs MB Gilbertson  | -1.574     | 3.355  | Yes                    | **      | -2.825 to -0.3239 |  |
| Nor. cereb. - Roth - 9 - vs MB Kool        | -1.419     | 2.99   | Yes                    | *       | -2.685 to -0.1543 |  |
| Nor. cereb. - Roth - 9 - vs MB Delattre    | -1.651     | 3.459  | Yes                    | **      | -2.924 to -0.3792 |  |
| MB Gilbertson vs MB Kool                   | 0.1548     | 0.6795 | No                     | ns      | -0.4522 to 0.7618 |  |
| MB Gilbertson vs MB Delattre               | -0.07719   | 0.331  | No                     | ns      | -0.6987 to 0.5443 |  |
| MB Kool vs MB Delattre                     | -0.232     | 0.9497 | No                     | ns      | -0.8828 to 0.4189 |  |

| Fig. 3A, DAOY                              |            |         |                        |         |                  |  |
|--------------------------------------------|------------|---------|------------------------|---------|------------------|--|
| Table Analyzed                             | DAOY       |         |                        |         |                  |  |
| One-way analysis of variance               |            |         |                        |         |                  |  |
| P value                                    | < 0.0001   |         |                        |         |                  |  |
| P value summary                            | ***        |         |                        |         |                  |  |
| Are means signif. different? (P < 0.05)    | Yes        |         |                        |         |                  |  |
| Number of groups                           | 6          |         |                        |         |                  |  |
| F                                          | 48.11      |         |                        |         |                  |  |
| R square                                   | 0.5091     |         |                        |         |                  |  |
| Bartlett's test for equal variances        |            |         |                        |         |                  |  |
| Bartlett's statistic (corrected)           | 83.43      |         |                        |         |                  |  |
| P value                                    | < 0.0001   |         |                        |         |                  |  |
| P value summary                            | ***        |         |                        |         |                  |  |
| Do the variances differ signif. (P < 0.05) | Yes        |         |                        |         |                  |  |
| ANOVA Table                                | SS         | df      | MS                     |         |                  |  |
| Treatment (between columns)                | 1732000    | 5       | 346303                 |         |                  |  |
| Residual (within columns)                  | 1670000    | 232     | 7198                   |         |                  |  |
| Total                                      | 3401000    | 237     |                        |         |                  |  |
| Bonferroni's Multiple Comparison Test      | Mean Diff. | t       | Significant? P < 0.05? | Summary | 95% CI of diff   |  |
| Control vs HGF 20 ng/ml                    | -196.7     | 10.24   | Yes                    | ***     | -253.7 to -139.7 |  |
| Control vs PHA                             | 44.98      | 2.371   | No                     | ns      | -11.29 to 101.2  |  |
| Control vs PHA+HGF                         | 60.23      | 3.175   | Yes                    | *       | 3.969 to 116.5   |  |
| Control vs ARQ                             | 0.562      | 0.02962 | No                     | ns      | -55.70 to 56.83  |  |
| Control vs ARQ+HGF                         | 34.99      | 1.844   | No                     | ns      | -21.28 to 91.25  |  |
| HGF 20 ng/ml vs PHA                        | 241.7      | 12.58   | Yes                    | ***     | 184.7 to 298.7   |  |
| HGF 20 ng/ml vs PHA+HGF                    | 257        | 13.37   | Yes                    | ***     | 200.0 to 314.0   |  |
| HGF 20 ng/ml vs ARQ                        | 197.3      | 10.27   | Yes                    | ***     | 140.3 to 254.3   |  |
| HGF 20 ng/ml vs ARQ+HGF                    | 231.7      | 12.06   | Yes                    | ***     | 174.7 to 288.7   |  |
| PHA vs PHA+HGF                             | 15.26      | 0.8041  | No                     | ns      | -41.01 to 71.52  |  |
| PHA vs ARQ                                 | -44.42     | 2.341   | No                     | ns      | -100.7 to 11.85  |  |
| PHA vs ARQ+HGF                             | -9.993     | 0.5268  | No                     | ns      | -66.26 to 46.27  |  |
| PHA+HGF vs ARQ                             | -59.67     | 3.145   | Yes                    | *       | -115.9 to -3.407 |  |
| PHA+HGF vs ARQ+HGF                         | -25.25     | 1.331   | No                     | ns      | -81.51 to 31.02  |  |
| ARQ vs ARQ+HGF                             | 34.42      | 1.815   | No                     | ns      | -21.84 to 90.69  |  |

| Fig. 3A, UW228                             |            |         |                        |         |                  |
|--------------------------------------------|------------|---------|------------------------|---------|------------------|
| Table Analyzed                             | UW228      |         |                        |         |                  |
| One-way analysis of variance               |            |         |                        |         |                  |
| P value                                    | < 0.0001   |         |                        |         |                  |
| P value summary                            | ***        |         |                        |         |                  |
| Are means signif. different? (P < 0.05)    | Yes        |         |                        |         |                  |
| Number of groups                           | 6          |         |                        |         |                  |
| F                                          | 29.99      |         |                        |         |                  |
| R square                                   | 0.4503     |         |                        |         |                  |
| Bartlett's test for equal variances        |            |         |                        |         |                  |
| Bartlett's statistic (corrected)           | 61.16      |         |                        |         |                  |
| P value                                    | < 0.0001   |         |                        |         |                  |
| P value summary                            | ***        |         |                        |         |                  |
| Do the variances differ signif. (P < 0.05) | Yes        |         |                        |         |                  |
| ANOVA Table                                | SS         | df      | MS                     |         |                  |
| Treatment (between columns)                | 458611     | 5       | 91722                  |         |                  |
| Residual (within columns)                  | 559740     | 183     | 3059                   |         |                  |
| Total                                      | 1018000    | 188     |                        |         |                  |
| Bonferroni's Multiple Comparison Test      | Mean Diff. | t       | Significant? P < 0.05? | Summary | 95% CI of diff   |
| Control vs HGF 20 ng/ml                    | -78.43     | 5.583   | Yes                    | ***     | -120.2 to -36.65 |
| Control vs PHA                             | 59.21      | 4.248   | Yes                    | ***     | 17.76 to 100.7   |
| Control vs PHA+HGF                         | 54.53      | 3.912   | Yes                    | **      | 13.08 to 95.98   |
| Control vs ARQ                             | 50.59      | 3.63    | Yes                    | **      | 9.133 to 92.04   |
| Control vs ARQ+HGF                         | 51.5       | 3.666   | Yes                    | **      | 9.723 to 93.28   |
| HGF 20 ng/ml vs PHA                        | 137.6      | 9.876   | Yes                    | ***     | 96.19 to 179.1   |
| HGF 20 ng/ml vs PHA+HGF                    | 133        | 9.54    | Yes                    | ***     | 91.51 to 174.4   |
| HGF 20 ng/ml vs ARQ                        | 129        | 9.257   | Yes                    | ***     | 87.56 to 170.5   |
| HGF 20 ng/ml vs ARQ+HGF                    | 129.9      | 9.25    | Yes                    | ***     | 88.15 to 171.7   |
| PHA vs PHA+HGF                             | -4.679     | 0.3384  | No                     | ns      | -45.80 to 36.44  |
| PHA vs ARQ                                 | -8.623     | 0.6237  | No                     | ns      | -49.75 to 32.50  |
| PHA vs ARQ+HGF                             | -7.706     | 0.5529  | No                     | ns      | -49.16 to 33.75  |
| PHA+HGF vs ARQ                             | -3.944     | 0.2852  | No                     | ns      | -45.07 to 37.18  |
| PHA+HGF vs ARQ+HGF                         | -3.026     | 0.2171  | No                     | ns      | -44.48 to 38.43  |
| ARQ vs ARQ+HGF                             | 0.9173     | 0.06582 | No                     | ns      | -40.54 to 42.37  |

| Fig. 3B DAOY                            |                   |
|-----------------------------------------|-------------------|
| Table Analyzed                          | DAOY              |
| Column A                                | Control           |
| vs                                      | vs                |
| Column B                                | HGF 20ng/ml       |
| Unpaired t test                         |                   |
| P value                                 | 0.0038            |
| P value summary                         | **                |
| Are means signif. different? (P < 0.05) | Yes               |
| One- or two-tailed P value?             | Two-tailed        |
| t, df                                   | t=6.025 df=4      |
| How big is the difference?              |                   |
| Mean ± SEM of column A                  | 122.0 ± 31.90 N=3 |
| Mean ± SEM of column B                  | 370.7 ± 26.19 N=3 |
| Difference between means                | -248.7 ± 41.27    |
| 95% confidence interval                 | -363.2 to -134.1  |
| R square                                | 0.9007            |
| F test to compare variances             |                   |
| F,DFn, Dfd                              | 1.483, 2, 2       |
| P value                                 | 0.8056            |
| P value summary                         | ns                |
| Are variances significantly different?  | No                |
|                                         |                   |
| Fig. 3B UW228                           |                   |
| Table Analyzed                          | UW228             |
| Column A                                | Control           |
| vs                                      | vs                |
| Column B                                | HGF               |
| Unpaired t test                         |                   |
| P value                                 | 0.0454            |
| P value summary                         | *                 |
| Are means signif. different? (P < 0.05) | Yes               |
| One- or two-tailed P value?             | Two-tailed        |
| t, df                                   | t=2.872 df=4      |
| How big is the difference?              |                   |
| Mean ± SEM of column A                  | 6.000 ± 2.517 N=3 |
| Mean ± SEM of column B                  | 60.33 ± 18.75 N=3 |
| Difference between means                | -54.33 ± 18.92    |
| 95% confidence interval                 | -106.8 to -1.825  |
| R square                                | 0.6735            |
| F test to compare variances             |                   |
| F,DFn, Dfd                              | 55.49, 2, 2       |
| P value                                 | 0.0354            |
| P value summary                         | *                 |
| Are variances significantly different?  | Yes               |

| Fig. 3D DAOY, Whiskers 5-95% percentile    |            |         |                        |         |                  |
|--------------------------------------------|------------|---------|------------------------|---------|------------------|
| Table Analyzed                             | DAOY       |         |                        |         |                  |
| One-way analysis of variance               |            |         |                        |         |                  |
| P value                                    | < 0.0001   |         |                        |         |                  |
| P value summary                            | ***        |         |                        |         |                  |
| Are means signif. different? (P < 0.05)    | Yes        |         |                        |         |                  |
| Number of groups                           | 6          |         |                        |         |                  |
| F                                          | 48.11      |         |                        |         |                  |
| R square                                   | 0.5091     |         |                        |         |                  |
| Bartlett's test for equal variances        |            |         |                        |         |                  |
| Bartlett's statistic (corrected)           | 83.43      |         |                        |         |                  |
| P value                                    | < 0.0001   |         |                        |         |                  |
| P value summary                            | ***        |         |                        |         |                  |
| Do the variances differ signif. (P < 0.05) | Yes        |         |                        |         |                  |
| ANOVA Table                                | SS         | df      | MS                     |         |                  |
| Treatment (between columns)                | 1732000    | 5       | 346303                 |         |                  |
| Residual (within columns)                  | 1670000    | 232     | 7198                   |         |                  |
| Total                                      | 3401000    | 237     |                        |         |                  |
| Bonferroni's Multiple Comparison Test      | Mean Diff. | t       | Significant? P < 0.05? | Summary | 95% CI of diff   |
| Control vs HGF 20 ng/ml                    | -196.7     | 10.24   | Yes                    | ***     | -253.7 to -139.7 |
| Control vs PHA                             | 44.98      | 2.371   | No                     | ns      | -11.29 to 101.2  |
| Control vs PHA+HGF                         | 60.23      | 3.175   | Yes                    | *       | 3.969 to 116.5   |
| Control vs ARQ                             | 0.562      | 0.02962 | No                     | ns      | -55.70 to 56.83  |
| Control vs ARQ+HGF                         | 34.99      | 1.844   | No                     | ns      | -21.28 to 91.25  |
| HGF 20 ng/ml vs PHA                        | 241.7      | 12.58   | Yes                    | ***     | 184.7 to 298.7   |
| HGF 20 ng/ml vs PHA+HGF                    | 257        | 13.37   | Yes                    | ***     | 200.0 to 314.0   |
| HGF 20 ng/ml vs ARQ                        | 197.3      | 10.27   | Yes                    | ***     | 140.3 to 254.3   |
| HGF 20 ng/ml vs ARQ+HGF                    | 231.7      | 12.06   | Yes                    | ***     | 174.7 to 288.7   |
| PHA vs PHA+HGF                             | 15.26      | 0.8041  | No                     | ns      | -41.01 to 71.52  |
| PHA vs ARQ                                 | -44.42     | 2.341   | No                     | ns      | -100.7 to 11.85  |
| PHA vs ARQ+HGF                             | -9.993     | 0.5268  | No                     | ns      | -66.26 to 46.27  |
| PHA+HGF vs ARQ                             | -59.67     | 3.145   | Yes                    | *       | -115.9 to -3.407 |
| PHA+HGF vs ARQ+HGF                         | -25.25     | 1.331   | No                     | ns      | -81.51 to 31.02  |
| ARQ vs ARQ+HGF                             | 34.42      | 1.815   | No                     | ns      | -21.84 to 90.69  |

| Fig. 3D UW228, Whiskers 5-95% percentile   |            |         |                        |         |                  |
|--------------------------------------------|------------|---------|------------------------|---------|------------------|
| Table Analyzed                             | UW228      |         |                        |         |                  |
| One-way analysis of variance               |            |         |                        |         |                  |
| P value                                    | < 0.0001   |         |                        |         |                  |
| P value summary                            | ***        |         |                        |         |                  |
| Are means signif. different? (P < 0.05)    | Yes        |         |                        |         |                  |
| Number of groups                           | 6          |         |                        |         |                  |
| F                                          | 29.99      |         |                        |         |                  |
| R square                                   | 0.4503     |         |                        |         |                  |
| Bartlett's test for equal variances        |            |         |                        |         |                  |
| Bartlett's statistic (corrected)           | 61.16      |         |                        |         |                  |
| P value                                    | < 0.0001   |         |                        |         |                  |
| P value summary                            | ***        |         |                        |         |                  |
| Do the variances differ signif. (P < 0.05) | Yes        |         |                        |         |                  |
| ANOVA Table                                | SS         | df      | MS                     |         |                  |
| Treatment (between columns)                | 458611     | 5       | 91722                  |         |                  |
| Residual (within columns)                  | 559740     | 183     | 3059                   |         |                  |
| Total                                      | 1018000    | 188     |                        |         |                  |
| Bonferroni's Multiple Comparison Test      | Mean Diff. | t       | Significant? P < 0.05? | Summary | 95% CI of diff   |
| Control vs HGF 20 ng/ml                    | -78.43     | 5.583   | Yes                    | ***     | -120.2 to -36.65 |
| Control vs PHA                             | 59.21      | 4.248   | Yes                    | ***     | 17.76 to 100.7   |
| Control vs PHA+HGF                         | 54.53      | 3.912   | Yes                    | **      | 13.08 to 95.98   |
| Control vs ARQ                             | 50.59      | 3.63    | Yes                    | **      | 9.133 to 92.04   |
| Control vs ARQ+HGF                         | 51.5       | 3.666   | Yes                    | **      | 9.723 to 93.28   |
| HGF 20 ng/ml vs PHA                        | 137.6      | 9.876   | Yes                    | ***     | 96.19 to 179.1   |
| HGF 20 ng/ml vs PHA+HGF                    | 133        | 9.54    | Yes                    | ***     | 91.51 to 174.4   |
| HGF 20 ng/ml vs ARQ                        | 129        | 9.257   | Yes                    | ***     | 87.56 to 170.5   |
| HGF 20 ng/ml vs ARQ+HGF                    | 129.9      | 9.25    | Yes                    | ***     | 88.15 to 171.7   |
| PHA vs PHA+HGF                             | -4.679     | 0.3384  | No                     | ns      | -45.80 to 36.44  |
| PHA vs ARQ                                 | -8.623     | 0.6237  | No                     | ns      | -49.75 to 32.50  |
| PHA vs ARQ+HGF                             | -7.706     | 0.5529  | No                     | ns      | -49.16 to 33.75  |
| PHA+HGF vs ARQ                             | -3.944     | 0.2852  | No                     | ns      | -45.07 to 37.18  |
| PHA+HGF vs ARQ+HGF                         | -3.026     | 0.2171  | No                     | ns      | -44.48 to 38.43  |
| ARQ vs ARQ+HGF                             | 0.9173     | 0.06582 | No                     | ns      | -40.54 to 42.37  |

| Fig. 4A, DAOY, Whiskers 5-95% percentile   |          |    |        |  |  |
|--------------------------------------------|----------|----|--------|--|--|
| Table Analyzed                             | DAOY     |    |        |  |  |
| One-way analysis of variance               |          |    |        |  |  |
| P value                                    | < 0.0001 |    |        |  |  |
| P value summary                            | ***      |    |        |  |  |
| Are means signif. different? (P < 0.05)    | Yes      |    |        |  |  |
| Number of groups                           | 4        |    |        |  |  |
| F                                          | 33.35    |    |        |  |  |
| R square                                   | 0.3907   |    |        |  |  |
| Bartlett's test for equal variances        |          |    |        |  |  |
| Bartlett's statistic (corrected)           | 22.28    |    |        |  |  |
| P value                                    | < 0.0001 |    |        |  |  |
| P value summary                            | ***      |    |        |  |  |
| Do the variances differ signif. (P < 0.05) | Yes      |    |        |  |  |
| ANOVA Table                                | SS       | df | MS     |  |  |
| Treatment (between columns)                | 371761   | 3  | 123920 |  |  |

|                                       |            |        |        |                        |         |                  |
|---------------------------------------|------------|--------|--------|------------------------|---------|------------------|
| Residual (within columns)             |            | 579720 | 156    | 3716                   |         |                  |
| Total                                 |            | 951481 | 159    |                        |         |                  |
| Bonferroni's Multiple Comparison Test | Mean Diff. | t      |        | Significant? P < 0.05? | Summary | 95% CI of diff   |
| Control vs SP600125                   |            | 6.375  | 0.4677 | No                     | ns      | -30.05 to 42.80  |
| Control vs HGF 20 ng/ml               |            | -114.1 | 8.368  | Yes                    | ***     | -150.5 to -77.64 |
| Control vs HGF+SP600125               |            | -23.92 | 1.754  | No                     | ns      | -60.34 to 12.51  |
| SP600125 vs HGF 20 ng/ml              |            | -120.4 | 8.836  | Yes                    | ***     | -156.9 to -84.02 |
| SP600125 vs HGF+SP600125              |            | -30.29 | 2.222  | No                     | ns      | -66.72 to 6.137  |
| HGF 20 ng/ml vs HGF+SP600125          |            | 90.15  | 6.614  | Yes                    | ***     | 53.73 to 126.6   |

|                                                 |            |        |        |                        |         |                  |
|-------------------------------------------------|------------|--------|--------|------------------------|---------|------------------|
| <b>Fig. 4A, UW228 Whiskers 5-95% percentile</b> |            |        |        |                        |         |                  |
| Table Analyzed                                  | UW228      |        |        |                        |         |                  |
| One-way analysis of variance                    |            |        |        |                        |         |                  |
| P value                                         | < 0.0001   |        |        |                        |         |                  |
| P value summary                                 | ***        |        |        |                        |         |                  |
| Are means signif. different? (P < 0.05)         | Yes        |        |        |                        |         |                  |
| Number of groups                                | 4          |        |        |                        |         |                  |
| F                                               | 53.7       |        |        |                        |         |                  |
| R square                                        | 0.5793     |        |        |                        |         |                  |
| Bartlett's test for equal variances             |            |        |        |                        |         |                  |
| Bartlett's statistic (corrected)                | 51.69      |        |        |                        |         |                  |
| P value                                         | < 0.0001   |        |        |                        |         |                  |
| P value summary                                 | ***        |        |        |                        |         |                  |
| Do the variances differ signif. (P < 0.05)      | Yes        |        |        |                        |         |                  |
| ANOVA Table                                     | SS         | df     | MS     |                        |         |                  |
| Treatment (between columns)                     | 385444     | 3      | 128481 |                        |         |                  |
| Residual (within columns)                       | 279906     | 117    | 2392   |                        |         |                  |
| Total                                           | 665351     | 120    |        |                        |         |                  |
| Bonferroni's Multiple Comparison Test           | Mean Diff. | t      |        | Significant? P < 0.05? | Summary | 95% CI of diff   |
| Control vs SP600125                             |            | 40.79  | 3.256  | Yes                    | **      | 7.166 to 74.41   |
| Control vs HGF 20 ng/ml                         |            | -103.4 | 8.251  | Yes                    | ***     | -137.0 to -69.74 |
| Control vs HGF+SP600125                         |            | 28.19  | 2.25   | No                     | ns      | -5.434 to 61.81  |
| SP600125 vs HGF 20 ng/ml                        |            | -144.1 | 11.41  | Yes                    | ***     | -178.0 to -110.3 |
| SP600125 vs HGF+SP600125                        |            | -12.6  | 0.9977 | No                     | ns      | -46.49 to 21.30  |
| HGF 20 ng/ml vs HGF+SP600125                    |            | 131.5  | 10.42  | Yes                    | ***     | 97.65 to 165.4   |

|                                            |            |        |       |                        |         |                  |
|--------------------------------------------|------------|--------|-------|------------------------|---------|------------------|
| <b>Fig. 5C</b>                             |            |        |       |                        |         |                  |
| Table Analyzed                             | Data 1     |        |       |                        |         |                  |
| One-way analysis of variance               |            |        |       |                        |         |                  |
| P value                                    | < 0.0001   |        |       |                        |         |                  |
| P value summary                            | ***        |        |       |                        |         |                  |
| Are means signif. different? (P < 0.05)    | Yes        |        |       |                        |         |                  |
| Number of groups                           | 3          |        |       |                        |         |                  |
| F                                          | 41.95      |        |       |                        |         |                  |
| R square                                   | 0.3203     |        |       |                        |         |                  |
| Bartlett's test for equal variances        |            |        |       |                        |         |                  |
| Bartlett's statistic (corrected)           | 86.25      |        |       |                        |         |                  |
| P value                                    | < 0.0001   |        |       |                        |         |                  |
| P value summary                            | ***        |        |       |                        |         |                  |
| Do the variances differ signif. (P < 0.05) | Yes        |        |       |                        |         |                  |
| ANOVA Table                                | SS         | df     | MS    |                        |         |                  |
| Treatment (between columns)                | 19698      | 2      | 9849  |                        |         |                  |
| Residual (within columns)                  | 41795      | 178    | 234.8 |                        |         |                  |
| Total                                      | 61493      | 180    |       |                        |         |                  |
| Bonferroni's Multiple Comparison Test      | Mean Diff. | t      |       | Significant? P < 0.05? | Summary | 95% CI of diff   |
| control vs MAP4K4-wt                       |            | -18.87 | 6.511 | Yes                    | ***     | -25.87 to -11.86 |
| control vs MAP4K4-K/R                      |            | 6.011  | 2.202 | No                     | ns      | -0.5865 to 12.61 |
| MAP4K4-wt vs MAP4K4-K/R                    |            | 24.88  | 8.935 | Yes                    | ***     | 18.15 to 31.61   |

|                                            |            |        |           |                        |         |                 |
|--------------------------------------------|------------|--------|-----------|------------------------|---------|-----------------|
| <b>Fig. 5E</b>                             |            |        |           |                        |         |                 |
| Table Analyzed                             | Data 1     |        |           |                        |         |                 |
| One-way analysis of variance               |            |        |           |                        |         |                 |
| P value                                    | < 0.0001   |        |           |                        |         |                 |
| P value summary                            | ***        |        |           |                        |         |                 |
| Are means signif. different? (P < 0.05)    | Yes        |        |           |                        |         |                 |
| Number of groups                           | 4          |        |           |                        |         |                 |
| F                                          | 52.67      |        |           |                        |         |                 |
| R square                                   | 0.334      |        |           |                        |         |                 |
| Bartlett's test for equal variances        |            |        |           |                        |         |                 |
| Bartlett's statistic (corrected)           | 28.22      |        |           |                        |         |                 |
| P value                                    | < 0.0001   |        |           |                        |         |                 |
| P value summary                            | ***        |        |           |                        |         |                 |
| Do the variances differ signif. (P < 0.05) | Yes        |        |           |                        |         |                 |
| ANOVA Table                                | SS         | df     | MS        |                        |         |                 |
| Treatment (between columns)                | 496400000  | 3      | 165500000 |                        |         |                 |
| Residual (within columns)                  | 989600000  | 315    | 3142000   |                        |         |                 |
| Total                                      | 1486000000 | 318    |           |                        |         |                 |
| Bonferroni's Multiple Comparison Test      | Mean Diff. | t      |           | Significant? P < 0.05? | Summary | 95% CI of diff  |
| begin, scr vs end, scr                     |            | 2368   | 8.369     | Yes                    | ***     | 1616 to 3119    |
| begin, scr vs begin, shMAP4K4              |            | -746.6 | 2.782     | Yes                    | *       | -1459 to -34.12 |
| begin, scr vs end shMAP4K4                 |            | -536   | 1.785     | No                     | ns      | -1333 to 261.2  |
| end, scr vs begin, shMAP4K4                |            | -3114  | 11.65     | Yes                    | ***     | -3824 to -2404  |
| end, scr vs end shMAP4K4                   |            | -2904  | 9.698     | Yes                    | ***     | -3698 to -2109  |
| begin, shMAP4K4 vs end shMAP4K4            |            | 210.6  | 0.7373    | No                     | ns      | -547.8 to 969.0 |

| Fig. 5E                                   |                        |
|-------------------------------------------|------------------------|
| Table Analyzed                            | Data 2                 |
| Column A                                  | shScr                  |
| vs                                        | vs                     |
| Column B                                  | shMAP4K4               |
| Mann Whitney test                         |                        |
| P value                                   | 0.0208                 |
| Exact or approximate P value?             | Gaussian Approximation |
| P value summary                           | *                      |
| Are medians signif. different? (P < 0.05) | Yes                    |
| One- or two-tailed P value?               | Two-tailed             |
| Sum of ranks in column A,B                | 1573 , 1508            |
| Mann-Whitney U                            | 518                    |

| Fig. S1A                                   |                      |          |                        |         |                   |
|--------------------------------------------|----------------------|----------|------------------------|---------|-------------------|
| Table Analyzed                             | Northcott 103, c-Met |          |                        |         |                   |
| One-way analysis of variance               |                      |          |                        |         |                   |
| P value                                    | < 0.0001             |          |                        |         |                   |
| P value summary                            | ***                  |          |                        |         |                   |
| Are means signif. different? (P < 0.05)    | Yes                  |          |                        |         |                   |
| Number of groups                           | 4                    |          |                        |         |                   |
| F                                          | 34.19                |          |                        |         |                   |
| R square                                   | 0.5088               |          |                        |         |                   |
| Bartlett's test for equal variances        |                      |          |                        |         |                   |
| Bartlett's statistic (corrected)           | 93.99                |          |                        |         |                   |
| P value                                    | < 0.0001             |          |                        |         |                   |
| P value summary                            | ***                  |          |                        |         |                   |
| Do the variances differ signif. (P < 0.05) | Yes                  |          |                        |         |                   |
| ANOVA Table                                | SS                   | df       | MS                     |         |                   |
| Treatment (between columns)                | 85.45                | 3        | 28.48                  |         |                   |
| Residual (within columns)                  | 82.49                | 99       | 0.8332                 |         |                   |
| Total                                      | 167.9                | 102      |                        |         |                   |
| Bonferroni's Multiple Comparison Test      | Mean Diff.           | t        | Significant? P < 0.05? | Summary | 95% CI of diff    |
| wnt vs shh                                 | -1.693               | 5.078    | Yes                    | ***     | -2.590 to -0.7953 |
| wnt vs group 3                             | -0.002143            | 0.006373 | No                     | ns      | -0.9075 to 0.9032 |
| wnt vs group 4                             | 0.5264               | 1.608    | No                     | ns      | -0.3548 to 1.408  |
| shh vs group 3                             | 1.691                | 7.048    | Yes                    | ***     | 1.045 to 2.336    |
| shh vs group 4                             | 2.219                | 9.771    | Yes                    | ***     | 1.608 to 2.831    |
| group 3 vs group 4                         | 0.5286               | 2.284    | No                     | ns      | -0.09452 to 1.152 |
|                                            |                      |          |                        |         |                   |
| Table Analyzed                             | MAGIC_c-Met          |          |                        |         |                   |
| One-way analysis of variance               |                      |          |                        |         |                   |
| P value                                    | < 0.0001             |          |                        |         |                   |
| P value summary                            | ***                  |          |                        |         |                   |
| Are means signif. different? (P < 0.05)    | Yes                  |          |                        |         |                   |
| Number of groups                           | 3                    |          |                        |         |                   |
| F                                          | 198.2                |          |                        |         |                   |
| R square                                   | 0.5843               |          |                        |         |                   |
| Bartlett's test for equal variances        |                      |          |                        |         |                   |
| Bartlett's statistic (corrected)           | 126.2                |          |                        |         |                   |
| P value                                    | < 0.0001             |          |                        |         |                   |
| P value summary                            | ***                  |          |                        |         |                   |
| Do the variances differ signif. (P < 0.05) | Yes                  |          |                        |         |                   |
| ANOVA Table                                | SS                   | df       | MS                     |         |                   |
| Treatment (between columns)                | 321.2                | 2        | 160.6                  |         |                   |
| Residual (within columns)                  | 228.5                | 282      | 0.8102                 |         |                   |
| Total                                      | 549.6                | 284      |                        |         |                   |
| Bonferroni's Multiple Comparison Test      | Mean Diff.           | t        | Significant? P < 0.05? | Summary | 95% CI of diff    |
| SHH vs group 3                             | 1.914                | 10.46    | Yes                    | ***     | 1.473 to 2.355    |
| SHH vs group 4                             | 2.814                | 19.8     | Yes                    | ***     | 2.472 to 3.156    |
| group 3 vs group 4                         | 0.8998               | 6.077    | Yes                    | ***     | 0.5433 to 1.256   |

| Fig. S1B                                   |                    |     |        |  |  |
|--------------------------------------------|--------------------|-----|--------|--|--|
| Table Analyzed                             | Northcott 103, HGF |     |        |  |  |
| One-way analysis of variance               |                    |     |        |  |  |
| P value                                    | 0.002              |     |        |  |  |
| P value summary                            | **                 |     |        |  |  |
| Are means signif. different? (P < 0.05)    | Yes                |     |        |  |  |
| Number of groups                           | 4                  |     |        |  |  |
| F                                          | 5.315              |     |        |  |  |
| R square                                   | 0.1399             |     |        |  |  |
| R square                                   | 0.1399             |     |        |  |  |
| Bartlett's test for equal variances        |                    |     |        |  |  |
| Bartlett's statistic (corrected)           | 4.368              |     |        |  |  |
| P value                                    | 0.2244             |     |        |  |  |
| P value summary                            | ns                 |     |        |  |  |
| Do the variances differ signif. (P < 0.05) | No                 |     |        |  |  |
| ANOVA Table                                | SS                 | df  | MS     |  |  |
| Treatment (between columns)                | 6.115              | 3   | 2.038  |  |  |
| Residual (within columns)                  | 37.58              | 98  | 0.3835 |  |  |
| Total                                      | 43.7               | 101 |        |  |  |

| Bonferroni's Multiple Comparison Test | Mean Diff. | t      | Significant? P < 0.05? | Summary | 95% CI of diff     |
|---------------------------------------|------------|--------|------------------------|---------|--------------------|
| wnt vs shh                            | -0.2131    | 0.8732 | No                     | ns      | -0.8703 to 0.4440  |
| wnt vs group 3                        | 0.231      | 0.9225 | No                     | ns      | -0.4432 to 0.9052  |
| wnt vs group 4                        | 0.3604     | 1.485  | No                     | ns      | -0.2931 to 1.014   |
| shh vs group 3                        | 0.4441     | 2.735  | Yes                    | *       | 0.006787 to 0.8813 |
| shh vs group 4                        | 0.5735     | 3.817  | Yes                    | **      | 0.1688 to 0.9781   |
| group 3 vs group 4                    | 0.1294     | 0.8071 | No                     | ns      | -0.3023 to 0.5611  |

| Table Analyzed                             |          | MAGIC_HGF              |         |                |                    |
|--------------------------------------------|----------|------------------------|---------|----------------|--------------------|
| One-way analysis of variance               |          |                        |         |                |                    |
| P value                                    | < 0.0001 |                        |         |                |                    |
| P value summary                            | ***      |                        |         |                |                    |
| Are means signif. different? (P < 0.05)    | Yes      |                        |         |                |                    |
| Number of groups                           | 3        |                        |         |                |                    |
| F                                          | 27.1     |                        |         |                |                    |
| R square                                   | 0.1612   |                        |         |                |                    |
| Bartlett's test for equal variances        |          |                        |         |                |                    |
| Bartlett's statistic (corrected)           | 97.92    |                        |         |                |                    |
| P value                                    | < 0.0001 |                        |         |                |                    |
| P value summary                            | ***      |                        |         |                |                    |
| Do the variances differ signif. (P < 0.05) | Yes      |                        |         |                |                    |
| ANOVA Table                                |          |                        |         |                |                    |
|                                            | SS       | df                     | MS      |                |                    |
| Treatment (between columns)                | 12.47    | 2                      | 6.236   |                |                    |
| Residual (within columns)                  | 64.89    | 282                    | 0.2301  |                |                    |
| Total                                      | 77.37    | 284                    |         |                |                    |
| Bonferroni's Multiple Comparison Test      |          |                        |         |                |                    |
| Mean Diff.                                 | t        | Significant? P < 0.05? | Summary | 95% CI of diff |                    |
| shh vs group 3                             | 0.4445   | 4.557                  | Yes     | ***            | 0.2096 to 0.6794   |
| shh vs group 4                             | 0.5575   | 7.361                  | Yes     | ***            | 0.3751 to 0.7399   |
| group 3 vs group 4                         | 0.1131   | 1.433                  | No      | ns             | -0.07698 to 0.3031 |

| Table Analyzed                             |          | Northcott 103, CD44    |         |                |                   |
|--------------------------------------------|----------|------------------------|---------|----------------|-------------------|
| One-way analysis of variance               |          |                        |         |                |                   |
| P value                                    | < 0.0001 |                        |         |                |                   |
| P value summary                            | ***      |                        |         |                |                   |
| Are means signif. different? (P < 0.05)    | Yes      |                        |         |                |                   |
| Number of groups                           | 4        |                        |         |                |                   |
| F                                          | 15.32    |                        |         |                |                   |
| R square                                   | 0.3215   |                        |         |                |                   |
| Bartlett's test for equal variances        |          |                        |         |                |                   |
| Bartlett's statistic (corrected)           | 10.91    |                        |         |                |                   |
| P value                                    | 0.0122   |                        |         |                |                   |
| P value summary                            | *        |                        |         |                |                   |
| Do the variances differ signif. (P < 0.05) | Yes      |                        |         |                |                   |
| ANOVA Table                                |          |                        |         |                |                   |
|                                            | SS       | df                     | MS      |                |                   |
| Treatment (between columns)                | 24.38    | 3                      | 8.126   |                |                   |
| Residual (within columns)                  | 51.45    | 97                     | 0.5305  |                |                   |
| Total                                      | 75.83    | 100                    |         |                |                   |
| Bonferroni's Multiple Comparison Test      |          |                        |         |                |                   |
| Mean Diff.                                 | t        | Significant? P < 0.05? | Summary | 95% CI of diff |                   |
| wnt vs shh                                 | 1.748    | 6.091                  | Yes     | ***            | 0.9752 to 2.521   |
| wnt vs group 3                             | 1.588    | 5.392                  | Yes     | ***            | 0.7946 to 2.381   |
| wnt vs group 4                             | 1.908    | 6.665                  | Yes     | ***            | 1.137 to 2.679    |
| shh vs group 3                             | -0.1606  | 0.8411                 | No      | ns             | -0.6751 to 0.3538 |
| shh vs group 4                             | 0.1593   | 0.8951                 | No      | ns             | -0.3201 to 0.6387 |
| group 3 vs group 4                         | 0.32     | 1.686                  | No      | ns             | -0.1911 to 0.8310 |

| Table Analyzed                             |          | MAGIC_CD44             |         |                |                    |
|--------------------------------------------|----------|------------------------|---------|----------------|--------------------|
| One-way analysis of variance               |          |                        |         |                |                    |
| P value                                    | 0.0004   |                        |         |                |                    |
| P value summary                            | ***      |                        |         |                |                    |
| Are means signif. different? (P < 0.05)    | Yes      |                        |         |                |                    |
| Number of groups                           | 3        |                        |         |                |                    |
| F                                          | 8.031    |                        |         |                |                    |
| R square                                   | 0.05389  |                        |         |                |                    |
| Bartlett's test for equal variances        |          |                        |         |                |                    |
| Bartlett's statistic (corrected)           | 25.77    |                        |         |                |                    |
| P value                                    | < 0.0001 |                        |         |                |                    |
| P value summary                            | ***      |                        |         |                |                    |
| Do the variances differ signif. (P < 0.05) | Yes      |                        |         |                |                    |
| ANOVA Table                                |          |                        |         |                |                    |
|                                            | SS       | df                     | MS      |                |                    |
| Treatment (between columns)                | 11.53    | 2                      | 5.763   |                |                    |
| Residual (within columns)                  | 202.4    | 282                    | 0.7176  |                |                    |
| Total                                      | 213.9    | 284                    |         |                |                    |
| Bonferroni's Multiple Comparison Test      |          |                        |         |                |                    |
| Mean Diff.                                 | t        | Significant? P < 0.05? | Summary | 95% CI of diff |                    |
| shh vs group 3                             | -0.3306  | 1.919                  | No      | ns             | -0.7455 to 0.08422 |
| shh vs group 4                             | 0.2158   | 1.613                  | No      | ns             | -0.1063 to 0.5379  |
| group 3 vs group 4                         | 0.5464   | 3.921                  | Yes     | ***            | 0.2108 to 0.8820   |

| Fig. S1D                                   |                       |        |                        |         |                     |
|--------------------------------------------|-----------------------|--------|------------------------|---------|---------------------|
| Table Analyzed                             | Northcott 103, MAP4K4 |        |                        |         |                     |
| One-way analysis of variance               |                       |        |                        |         |                     |
| P value                                    | < 0.0001              |        |                        |         |                     |
| P value summary                            | ***                   |        |                        |         |                     |
| Are means signif. different? (P < 0.05)    | Yes                   |        |                        |         |                     |
| Number of groups                           | 4                     |        |                        |         |                     |
| F                                          | 17.34                 |        |                        |         |                     |
| R square                                   | 0.3444                |        |                        |         |                     |
| Bartlett's test for equal variances        |                       |        |                        |         |                     |
| Bartlett's statistic (corrected)           | 8.585                 |        |                        |         |                     |
| P value                                    | 0.0353                |        |                        |         |                     |
| P value summary                            | *                     |        |                        |         |                     |
| Do the variances differ signif. (P < 0.05) | Yes                   |        |                        |         |                     |
| ANOVA Table                                | SS                    | df     | MS                     |         |                     |
| Treatment (between columns)                | 8.529                 | 3      | 2.843                  |         |                     |
| Residual (within columns)                  | 16.23                 | 99     | 0.164                  |         |                     |
| Total                                      | 24.76                 | 102    |                        |         |                     |
| Bonferroni's Multiple Comparison Test      | Mean Diff.            | t      | Significant? P < 0.05? | Summary | 95% CI of diff      |
| wnt vs shh                                 | -0.7403               | 4.639  | Yes                    | ***     | -1.170 to -0.3107   |
| wnt vs group 3                             | -0.06                 | 0.3681 | No                     | ns      | -0.4988 to 0.3788   |
| wnt vs group 4                             | -0.5017               | 3.162  | Yes                    | *       | -0.9289 to -0.07451 |
| shh vs group 3                             | 0.6803                | 6.474  | Yes                    | ***     | 0.3974 to 0.9632    |
| shh vs group 4                             | 0.2386                | 2.428  | No                     | ns      | -0.02592 to 0.5031  |
| group 3 vs group 4                         | -0.4417               | 4.259  | Yes                    | ***     | -0.7209 to -0.1625  |

|                                            |              |       |                        |         |                    |
|--------------------------------------------|--------------|-------|------------------------|---------|--------------------|
| Table Analyzed                             | MAGIC-MAP4K4 |       |                        |         |                    |
| One-way analysis of variance               |              |       |                        |         |                    |
| P value                                    | < 0.0001     |       |                        |         |                    |
| P value summary                            | ***          |       |                        |         |                    |
| Are means signif. different? (P < 0.05)    | Yes          |       |                        |         |                    |
| Number of groups                           | 3            |       |                        |         |                    |
| F                                          | 66.22        |       |                        |         |                    |
| R square                                   | 0.3203       |       |                        |         |                    |
| Bartlett's test for equal variances        |              |       |                        |         |                    |
| Bartlett's statistic (corrected)           | 1.147        |       |                        |         |                    |
| P value                                    | 0.5635       |       |                        |         |                    |
| P value summary                            | ns           |       |                        |         |                    |
| Do the variances differ signif. (P < 0.05) | No           |       |                        |         |                    |
| ANOVA Table                                | SS           | df    | MS                     |         |                    |
| Treatment (between columns)                | 11.44        | 2     | 5.722                  |         |                    |
| Residual (within columns)                  | 24.28        | 281   | 0.08641                |         |                    |
| Total                                      | 35.73        | 283   |                        |         |                    |
| Bonferroni's Multiple Comparison Test      | Mean Diff.   | t     | Significant? P < 0.05? | Summary | 95% CI of diff     |
| shh vs group 3                             | 0.6842       | 11.39 | Yes                    | ***     | 0.5396 to 0.8288   |
| shh vs group 4                             | 0.2678       | 5.726 | Yes                    | ***     | 0.1552 to 0.3805   |
| group 3 vs group 4                         | -0.4164      | 8.611 | Yes                    | ***     | -0.5328 to -0.2999 |

| Fig. S4                                    |            |        |                        |         |                  |
|--------------------------------------------|------------|--------|------------------------|---------|------------------|
| Table Analyzed                             | DAOY       |        |                        |         |                  |
| One-way analysis of variance               |            |        |                        |         |                  |
| P value                                    | < 0.0001   |        |                        |         |                  |
| P value summary                            | ***        |        |                        |         |                  |
| Are means signif. different? (P < 0.05)    | Yes        |        |                        |         |                  |
| Number of groups                           | 6          |        |                        |         |                  |
| F                                          | 32.76      |        |                        |         |                  |
| R square                                   | 0.4849     |        |                        |         |                  |
| Bartlett's test for equal variances        |            |        |                        |         |                  |
| Bartlett's statistic (corrected)           | 35.52      |        |                        |         |                  |
| P value                                    | < 0.0001   |        |                        |         |                  |
| P value summary                            | ***        |        |                        |         |                  |
| Do the variances differ signif. (P < 0.05) | Yes        |        |                        |         |                  |
| ANOVA Table                                | SS         | df     | MS                     |         |                  |
| Treatment (between columns)                | 491965     | 5      | 98393                  |         |                  |
| Residual (within columns)                  | 522633     | 174    | 3004                   |         |                  |
| Total                                      | 1015000    | 179    |                        |         |                  |
| Bonferroni's Multiple Comparison Test      | Mean Diff. | t      | Significant? P < 0.05? | Summary | 95% CI of diff   |
| Control vs HGF                             | -101.8     | 7.192  | Yes                    | ***     | -143.9 to -59.66 |
| Control vs JIP                             | 48.27      | 3.411  | Yes                    | *       | 6.153 to 90.39   |
| Control vs JIP+HGF                         | 39.09      | 2.762  | No                     | ns      | -3.030 to 81.20  |
| Control vs AEG                             | 43.56      | 3.079  | Yes                    | *       | 1.448 to 85.68   |
| Control vs AEG+HGF                         | 29.19      | 2.063  | No                     | ns      | -12.93 to 71.31  |
| HGF vs JIP                                 | 150        | 10.6   | Yes                    | ***     | 107.9 to 192.2   |
| HGF vs JIP+HGF                             | 140.9      | 9.954  | Yes                    | ***     | 98.75 to 183.0   |
| HGF vs AEG                                 | 145.3      | 10.27  | Yes                    | ***     | 103.2 to 187.5   |
| HGF vs AEG+HGF                             | 131        | 9.255  | Yes                    | ***     | 88.85 to 173.1   |
| JIP vs JIP+HGF                             | -9.183     | 0.6489 | No                     | ns      | -51.30 to 32.93  |
| JIP vs AEG                                 | -4.705     | 0.3325 | No                     | ns      | -46.82 to 37.41  |
| JIP vs AEG+HGF                             | -19.08     | 1.348  | No                     | ns      | -61.20 to 23.04  |
| JIP+HGF vs AEG                             | 4.478      | 0.3165 | No                     | ns      | -37.64 to 46.59  |
| JIP+HGF vs AEG+HGF                         | -9.898     | 0.6995 | No                     | ns      | -52.01 to 32.22  |
| AEG vs AEG+HGF                             | -14.38     | 1.016  | No                     | ns      | -56.49 to 27.74  |

|                                            |            |        |                        |         |                  |
|--------------------------------------------|------------|--------|------------------------|---------|------------------|
| Table Analyzed                             | UW228      |        |                        |         |                  |
| One-way analysis of variance               |            |        |                        |         |                  |
| P value                                    | < 0.0001   |        |                        |         |                  |
| P value summary                            | ***        |        |                        |         |                  |
| Are means signif. different? (P < 0.05)    | Yes        |        |                        |         |                  |
| Number of groups                           | 6          |        |                        |         |                  |
| F                                          | 41.99      |        |                        |         |                  |
| R square                                   | 0.5468     |        |                        |         |                  |
| Bartlett's test for equal variances        |            |        |                        |         |                  |
| Bartlett's statistic (corrected)           | 43.17      |        |                        |         |                  |
| P value                                    | < 0.0001   |        |                        |         |                  |
| P value summary                            | ***        |        |                        |         |                  |
| Do the variances differ signif. (P < 0.05) | Yes        |        |                        |         |                  |
| ANOVA Table                                | SS         | df     | MS                     |         |                  |
| Treatment (between columns)                | 281409     | 5      | 56282                  |         |                  |
| Residual (within columns)                  | 233242     | 174    | 1340                   |         |                  |
| Total                                      | 514651     | 179    |                        |         |                  |
| Bonferroni's Multiple Comparison Test      | Mean Diff. | t      | Significant? P < 0.05? | Summary | 95% CI of diff   |
| Control vs HGF                             | -70.97     | 7.507  | Yes                    | ***     | -99.10 to -42.83 |
| Control vs JIP                             | 45.2       | 4.781  | Yes                    | ***     | 17.06 to 73.34   |
| Control vs JIP+HGF                         | 10.3       | 1.09   | No                     | ns      | -17.83 to 38.44  |
| Control vs AEG                             | 19.96      | 2.111  | No                     | ns      | -8.179 to 48.09  |
| Control vs AEG+HGF                         | 47.38      | 5.012  | Yes                    | ***     | 19.25 to 75.52   |
| HGF vs JIP                                 | 116.2      | 12.29  | Yes                    | ***     | 88.03 to 144.3   |
| HGF vs JIP+HGF                             | 81.27      | 8.597  | Yes                    | ***     | 53.13 to 109.4   |
| HGF vs AEG                                 | 90.92      | 9.618  | Yes                    | ***     | 62.79 to 119.1   |
| HGF vs AEG+HGF                             | 118.4      | 12.52  | Yes                    | ***     | 90.21 to 146.5   |
| JIP vs JIP+HGF                             | -34.9      | 3.691  | Yes                    | **      | -63.03 to -6.761 |
| JIP vs AEG                                 | -25.24     | 2.67   | No                     | ns      | -53.38 to 2.893  |
| JIP vs AEG+HGF                             | 2.184      | 0.2311 | No                     | ns      | -25.95 to 30.32  |
| JIP+HGF vs AEG                             | 9.654      | 1.021  | No                     | ns      | -18.48 to 37.79  |
| JIP+HGF vs AEG+HGF                         | 37.08      | 3.923  | Yes                    | **      | 8.945 to 65.22   |
| AEG vs AEG+HGF                             | 27.43      | 2.901  | No                     | ns      | -0.7088 to 55.56 |
